# Supplementary material
Source: PubMed Central journal article supplement (PMC4902582)
Supplement: supp_pp.15.01831_01831REVISED_SUPPLEMENTARY_INFORMATION.pdf [file supp_pp.15.01831_01831REVISED_SUPPLEMENTARY_INFORMATION.pdf]

## SUPPLEMENTARY INFORMATION

### **MicroRNA858 is a potential regulator of phenylpropanoid pathway and plant development in *Arabidopsis***

Deepika Sharma<sup>1, 2</sup>, Manish Tiwari<sup>1, \$</sup>, Ashutosh Pandey<sup>1, #</sup>, Chitra Bhatia<sup>1, 2</sup>, Ashish Sharma<sup>1</sup>, Prabodh Kumar Trivedi<sup>1, 2, \*</sup>

<sup>1</sup>CSIR-National Botanical Research Institute, Council of Scientific and Industrial Research (CSIR-NBRI), Rana Pratap Marg, Lucknow-226001, INDIA

<sup>2</sup>Academy of Scientific and Innovative Research (AcSIR), Anusandhan Bhawan, 2 Rafi Marg, New Delhi-110 001, India

<sup>\$</sup>Present address (MT): Department of Biology, Western Kentucky University Bowling Green, KY, USA.

<sup>\$</sup>Present address (AP): National Agri-Food Biotechnology Institute (NABI), Mohali-160071, Punjab, INDIA

\*Corresponding author

**e-mail:** [prabodht@hotmail.com](mailto:prabodht@hotmail.com); [prabodht@nbri.res.in](mailto:prabodht@nbri.res.in)

**Short title:** Flavanoid pathway regulation by miR858

The authors responsible for distribution of materials integral to the findings presented in this article in accordance with the policy described in the Instructions for Authors ([www.plantcell.org](http://www.plantcell.org)) are: Prabodh Kumar Trivedi ([prabodht@nbri.res.in](mailto:prabodht@nbri.res.in)).

**A**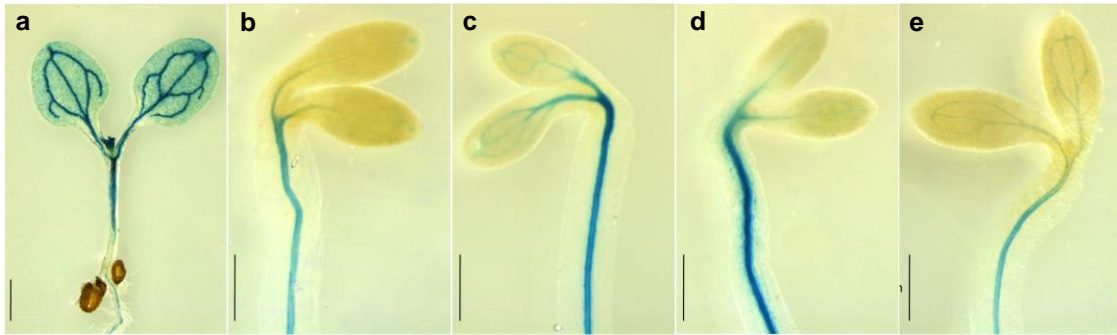**B**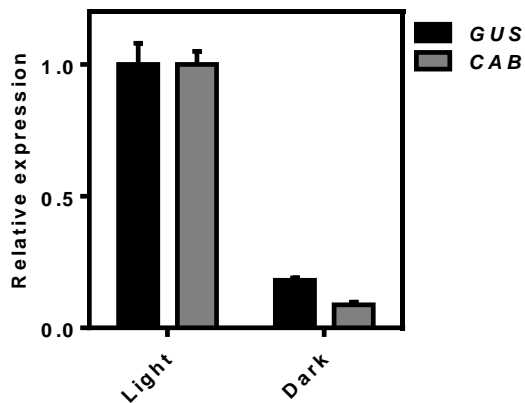**C**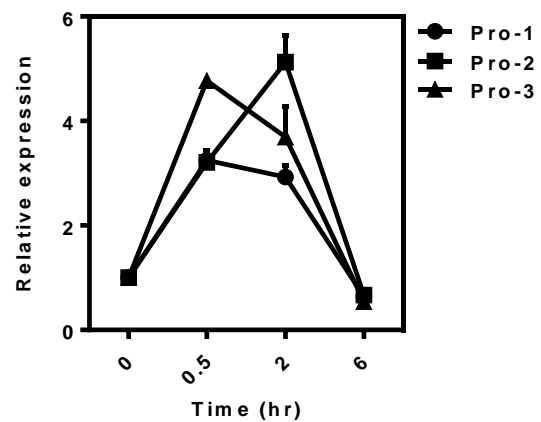

**Supplementary Figure S1.** Expression of the miR858a is regulated by light. **(A)** GUS activity in *ProMIR858:GUS* transgenic driven by light. **(a)** GUS activity driven by a 1.8 kbp upstream promoter sequence of pre-miR858a in the *ProMIR858:GUS* expressing seedlings after 5 days of germination in light. Bar = 1 mm **(b)** GUS activity in *ProMIR858:GUS* expressing seedlings grown in complete dark condition for 5 days. **(c)** GUS activity in dark grown seedlings exposed to light for 0.5 hr. **(d)** GUS activity in dark grown seedlings exposed to light for 2 hr. **(e)** GUS activity in dark grown seedlings exposed to light for 6 hr. For b to e, Bar = 0.5 mm. **(B)** Relative expression of *GUS* and Chlorophyll A/B Binding (*CAB*) genes in *ProMIR858:GUS* expressing seedling grown under light and dark conditions for 5 days. *CAB* is taken as positive control. Transcript abundance of each gene was normalized by the level of *TUBULIN* gene. **(C)** Relative expression of *GUS* gene in *ProMIR858:GUS* transgenic lines (Pro-1, Pro-2 and Pro-3) at different times of exposure to light after 5 days of growth in dark. Error bars indicate  $\pm$ SE (n=3) from three biological replicates (each with three technical replicates).



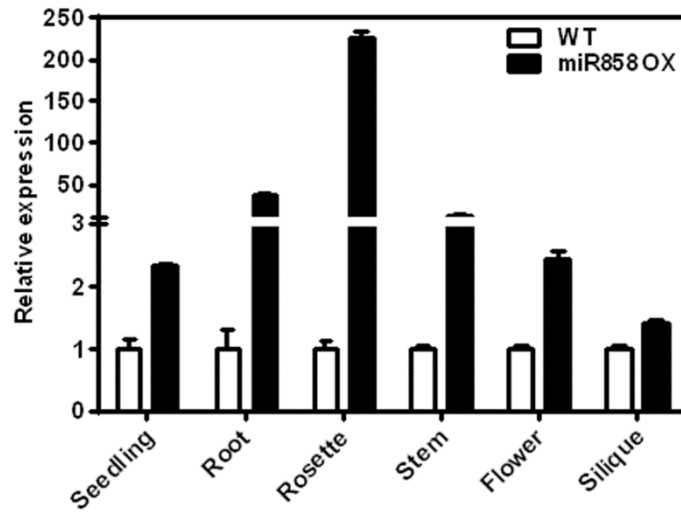

**Supplementary Figure S3.** Expression analysis of miR858a in *Arabidopsis*. Expressions of mature miR858a gene in different tissues of WT and miR858OX transgenic lines. *TUBULIN* was taken as internal control for normalization. Error bars represents  $\pm$ SE (n=3).

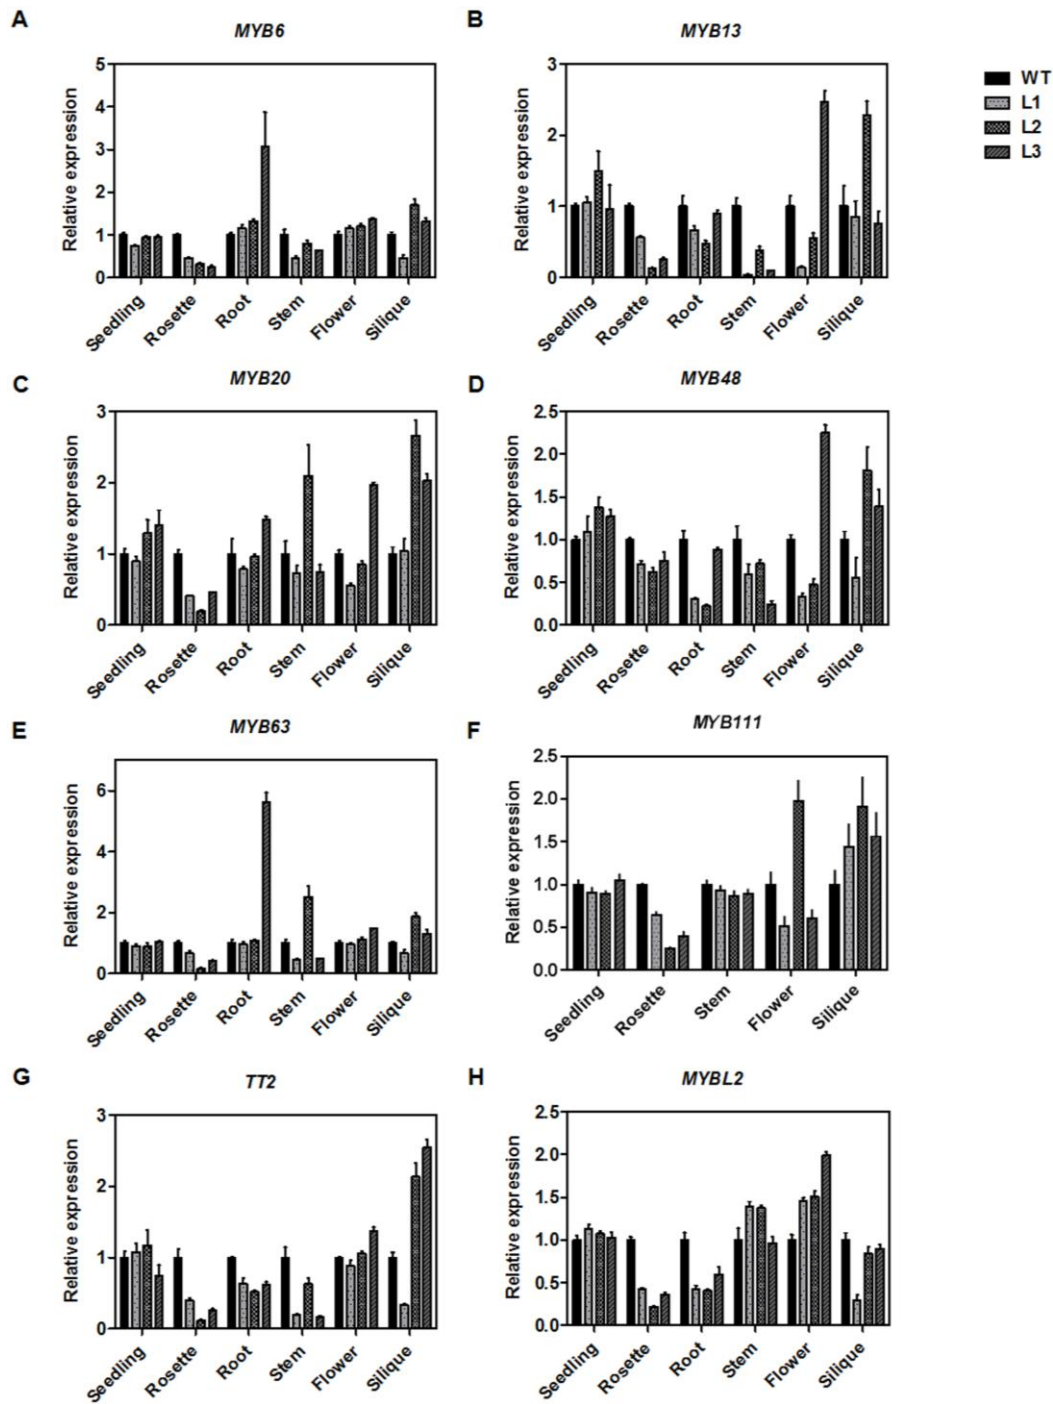

**Supplementary Figure S4.** Relative expression of MYB transcription factors in miR858OX transgenic lines. **A to H**, Expression of *MYB6*, *MYB13*, *MYB20*, *MYB48*, *MYB63*, *MYB111*, *TT2*, *MYBL2* in seedling, rosette, root, stem, flower and silique tissue of miR858OX lines. For *MYB111* (**F**) no expression was obtained in root. *TUBULIN* was taken as internal control for normalization. Error bars represents  $\pm$ SE (n=3).

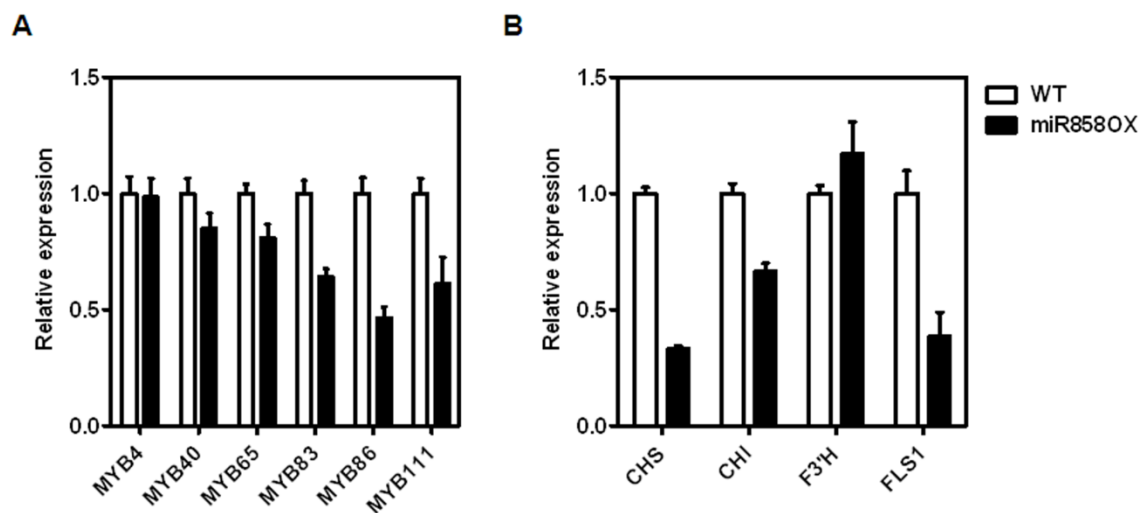

**Supplementary Figure S5.** Modulation of gene expression in miR858OX transgenic line. **(A)** Relative expression of MYB genes identified through microarray analysis. **(B)** Relative expression of structural genes of flavonoid pathway. *TUBULIN* was taken as endogenous control. Data given are fold expression  $\log_2$  (transgenic/wild-type). Error bars represents  $\pm$ SE (n=3).

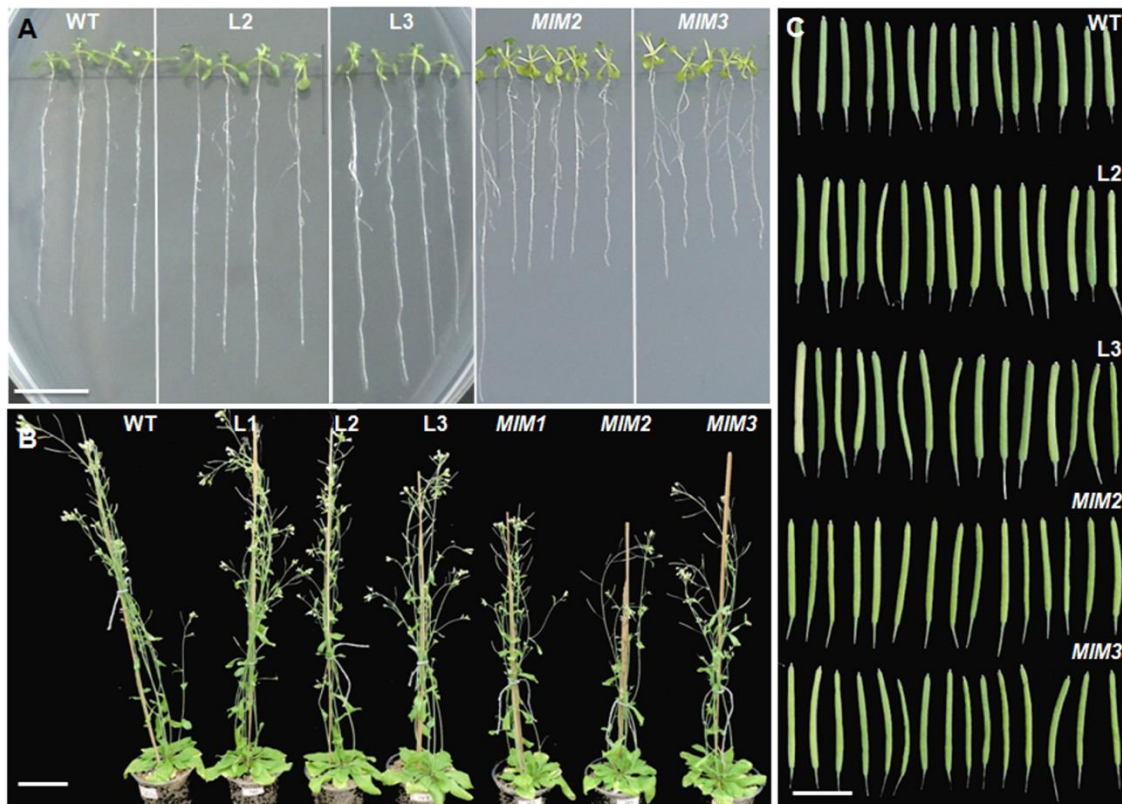

**Supplementary Figure S6.** Phenotypic variations in miR858OX transgenic lines. (A) Seedling phenotype of wild-type, miR858OX (L2 and L3) and *MIM858* (*MIM2* and *MIM3*) transgenic lines. Phenotypic changes in wild-type, miR858OX and *MIM858* transgenic lines grown on  $\frac{1}{2}$  MS media for 10 days are shown. Bars = 1 cm. (B) Growth phenotypes of 5-week-old wild-type, miR858OX and *MIM858* transgenic plants. Bar = 1 cm. (C) Phenotype of transgenic lines producing longer silique than wild-type. Photograph of 6 week grown plants was taken.

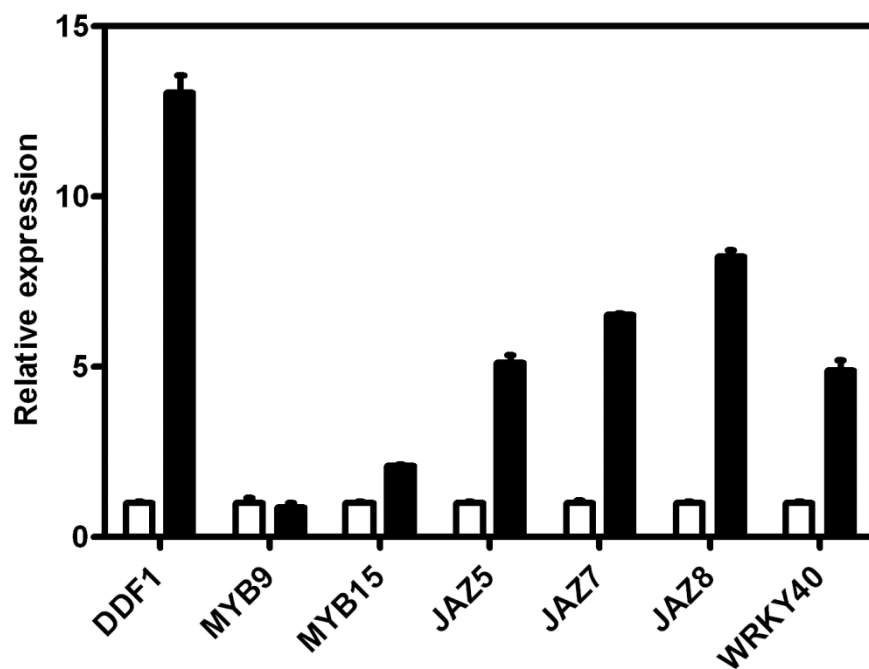

**Supplementary Figure S7.** Expression analysis of significantly up-regulated genes in miR858OX transgenic lines. Relative expression of significantly up-regulated genes in miR858OX line. *TUBULIN* was taken as endogenous control. Data given are fold expression  $\log_2$  (transgenic/wild-type). Error bars represents  $\pm$ SE (n=3).



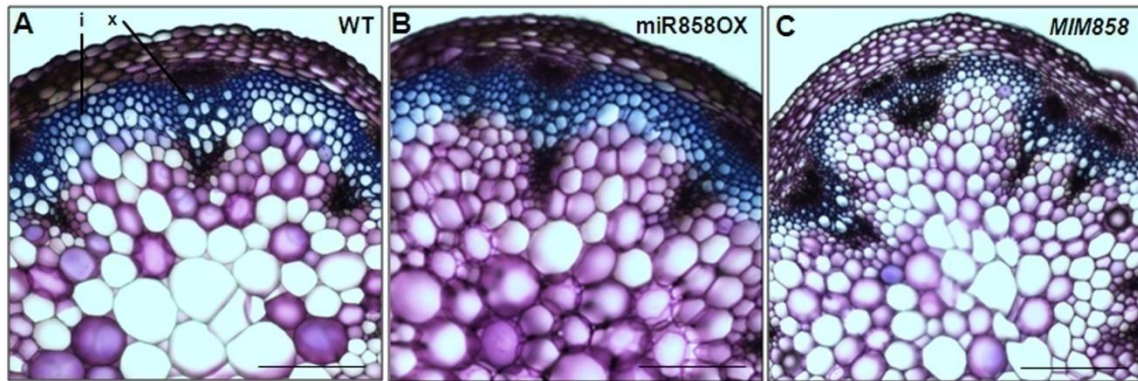

**Supplementary Figure S8.** miR858a affects lignin depositions in *Arabidopsis* stem. Histochemical staining of stem sections of mature *Arabidopsis* stem sections with toluidine blue O (TBO) for detection of lignin. i, interfascicular fiber; x, xylem. Bars = 500  $\mu$ m. (A) TBO staining (blue colour) of a wild-type stem section showing the normal lignin deposition in the walls of interfascicular fibers and xylem cells. (B) TBO stained miR858OX stem section showing ectopic lignin deposition in the walls of interfascicular fibers and xylem cells. (C) TBO stained *MIM858* stem section showing lesser lignin deposition in the walls of interfascicular fibers and xylem cells.

**Supplementary Table S1.** Alignment of miR858a mature sequence among different plant species

| <b>miRNA ID</b> | <b>Sequence (5' to 3')</b> | <b>Strand</b> | <b>Nucleotides</b> |
|-----------------|----------------------------|---------------|--------------------|
| ath-miR858a     | UUUCGUUGUCUGUUCGACCUU      | -             | 21                 |
| ath-miR858b     | UUCGUUGUCUGUUCGACCUU       | +             | 20                 |
| aly-miR858-5p   | UUUCGUUGUCUGUUCGACCUU      | +             | 21                 |
| aly-miR858-3p   | UUCGUUGUCUGCUCGACC         | -             | 18                 |
| cme-miR858      | UCUCGUUGUCUGUUCGACCUU      | +             | 21                 |
| mdm-miR858      | UUCGUUGUCUGUUCGACCUU       | +             | 19                 |
| ppe-miR858      | UCGUUGUCUGUUCGACCUU        | +             | 20                 |
| gh-miR858       | UUCAUUGUCUGUUCGACCUGA      | +             | 21                 |
| sly-miR858      | UUUCGUUGUCUGUUCGACCUU      | +             | 21                 |

*A. thaliana* (ath), *A. lyrata* (aly), *C. melo* (cme), *P. Persica* (ppe), *G. hirsutum* (gh) and *S. lycopersicum* (sly).

**Supplementary Table S2.** Putative *cis*-acting elements in miR858a promoter

| Site Name   | Sequence     | Position | Function                      |
|-------------|--------------|----------|-------------------------------|
| 3-AF1       | AAGAGATATTT  | -1366    | Light responsive element      |
| ACE         | ACGTGGA      | +346     |                               |
|             | CTAACGTAT    | +591     |                               |
| Box 4       | ATTAAT       | +437     |                               |
|             |              | +612     |                               |
|             |              | +465     |                               |
| Box I       | TTTCAAA      | -849     |                               |
| CATT motif  | GCATTC       | +596     |                               |
| G box       | CACGTA       | +1167    |                               |
|             | CACGTG       | +1224    |                               |
| GAG motif   | GGAGATG      | +144     |                               |
|             |              | +1441    |                               |
| GT1 motif   | AATCCACA     | -1300    |                               |
| L box       | CTCACCTACCAA | -375     |                               |
| Sp1         | CC(G/A)CCC   | -1054    |                               |
| TCT motif   | TCTTAC       | +1332    |                               |
| ARE         | TGGTTT       | -315     | Anaerobic induction           |
|             |              | -1193    |                               |
| LTR         | CCGAAA       | -969     | Low-temperature responsive    |
| ABRE        | TACGTG       | -1167    | ABA responsive element        |
|             | CACGTG       | +1224    |                               |
| P box       | CCTTTTG      | -795     | GA-responsive element         |
| TCA element | TCAGAAGAGG   | +1432    | SA-responsive                 |
| TGACG motif | TGACG        | +344     | MeJA-responsive               |
| CGTCA motif | CGTCA        | -344     |                               |
| GCN4 motif  | TGAGTCA      | +1184    | Endosperm expression          |
| Skn 1 motif | GTCAT        | -343     |                               |
|             |              | -890     |                               |
| O2 site     | GATGACATGG   | +342     | Zein metabolism regulation    |
| circadian   | CAAAGATATC   | +1363    | Involved in circadian control |

**Supplementary Table S3.** Putative targets of *Arabidopsis* miR858a

| <b>Target accession</b> | <b>Target description</b> | <b>Functions</b>                                            |
|-------------------------|---------------------------|-------------------------------------------------------------|
| AT1G22640               | MYB3                      | Phenylpropanoid pathway                                     |
| AT5G26660               | MYB4/86                   | Negative regulation, flavonol biosynthesis                  |
| AT4G09460               | MYB6                      | -                                                           |
| AT3G62610               | MYB11                     | Phenylpropanoid pathway / flavonol biosynthesis             |
| AT2G47460               | MYB12                     | Phenylpropanoid pathway / flavonol biosynthesis             |
| AT1G06180               | MYB13                     | Abiotic stress response / drought, light and wounding       |
| AT2G31180               | MYB14                     | Regulates seed mucilage biosynthesis and trichome branching |
| AT3G61250               | MYB17                     | Flower development, response to JA and SA stimulus          |
| AT5G52260               | MYB19                     | -                                                           |
| AT1G66230               | MYB20                     | Secondary cell wall biosynthesis                            |
| AT3G27810               | MYB21                     | Stamen development, GA- and JA-mediated                     |
| AT4G34990               | MYB32                     | Phenylpropanoid pathway                                     |
| AT5G60890               | MYB34                     | Glucosinolate biosynthesis / indolic pool                   |
| AT5G23000               | MYB37                     | Axillary meristem regulation / lateral organ formation      |
| AT4G17785               | MYB39                     | Sequence-specific DNA binding transcription factor          |
| AT5G14340               | MYB40                     | -                                                           |
| AT4G12350               | MYB42                     | Secondary cell wall biosynthesis                            |
| AT3G46130               | MYB48                     | Response to salicylic acid stimulus                         |
| AT5G54230               | MYB49                     | -                                                           |
| AT1G09540               | MYB61                     | Mucilage deposition and extrusion                           |
| AT1G79180               | MYB63                     | Phenylpropanoid pathway / lignin biosynthesis               |
| AT3G11440               | MYB65                     | Stamen development / anther development (tapetum)           |
| AT4G05100               | MYB74                     | -                                                           |
| AT4G13480               | MYB79                     | -                                                           |
| AT5G56110               | MYB80                     | Stamen development / anther (tapetum) and pollen (exine)    |
| AT2G26960               | MYB81                     | -                                                           |

---

|           |            |                                                           |
|-----------|------------|-----------------------------------------------------------|
| AT5G52600 | MYB82      | Regulation of trichome development                        |
| AT3G08500 | MYB83      | Secondary cell wall biosynthesis                          |
| AT3G49690 | MYB84      | Axillary meristem regulation / lateral organ formation    |
| AT4G22680 | MYB85      | Lignin deposition / cell wall thickening (fiber cells)    |
| AT4G37780 | MYB87      | Cell wall organization                                    |
| AT5G10280 | MYB92      | Branching, GA-mediated                                    |
| AT1G34670 | MYB93      | -                                                         |
| AT4G26930 | MYB97      | Participate in pollen tube reception                      |
| AT5G62320 | MYB99      | Stamen development / anther development (tapetum)         |
| AT2G26950 | MYB104     | -                                                         |
| AT3G02940 | MYB107     | DNA-dependent, response to SA stimulus                    |
| AT5G49330 | MYB111     | Phenylpropanoid pathway / flavonol biosynthesis           |
| AT1G25340 | MYB116     | Stamen development / anther development (tapetum)         |
| AT5G55020 | MYB120     | Participate in pollen tube reception                      |
| AT3G30210 | MYB121     | -                                                         |
| AT5G35550 | MYB123/TT2 | Phenylpropanoid pathway / proanthocyanindins biosynthesis |
| AT3G24310 | MYB71/305  | -                                                         |
| AT1G71030 | MYBL2      | Proanthocyanidin biosynthetic process                     |
| AT1G17760 | ATCSTF77   | Involve in mRNA polyadenylation                           |

---

**Supplementary Table S4.** Differentially expressed MYB transcription factors and flavonoid structural genes

| <b>AGI accession</b>             | <b>Gene symbol</b> | <b>Fold Change</b> |
|----------------------------------|--------------------|--------------------|
| <b>MYB transcription factors</b> |                    |                    |
| AT5G62320                        | MYB99              | -1.58              |
| AT5G49330                        | MYB111             | -1.55              |
| AT1G09540                        | MYB61              | -1.52              |
| AT5G11510                        | MYB3R-4            | -1.47              |
| AT4G32730                        | PC-MYB1            | -1.45              |
| AT5G58850                        | MYB119             | -1.42              |
| AT3G18100                        | MYB4R1             | -1.39              |
| AT1G22640                        | MYB3               | -1.38              |
| AT1G74080                        | MYB122             | -1.34              |
| AT5G59780                        | MYB59              | -1.31              |
| AT2G16720                        | MYB7               | -1.3               |
| AT2G23290                        | MYB70              | -1.29              |
| AT3G50060                        | MYB77              | -1.28              |
| AT5G14340                        | MYB40              | -1.28              |
| AT3G08500                        | MYB83              | -1.26              |
| AT4G22680                        | MYB85              | -1.25              |
| AT2G32460                        | MYB101             | -1.23              |
| AT1G66390                        | MYB90              | -1.22              |
| AT5G26660                        | MYB86              | -1.22              |
| AT1G66370                        | MYB113             | -1.2               |
| AT4G01680                        | MYB55              | -1.2               |
| <b>Pathway genes</b>             |                    |                    |
| AT5G13930                        | CHS/TT4            | -1.72              |
| AT3G55120                        | CHI/TT5            | -1.43              |
| AT3G51240                        | F3H/TT6            | -1.43              |
| AT5G07990                        | F3'H/TT7           | -1.35              |
| AT5G46330                        | FLS2               | -1.5               |
| AT5G63590                        | FLS3               | -1.38              |
| AT5G63600                        | FLS5               | -1.31              |
| AT4G34135                        | UGT73B2            | -1.33              |
| AT1G30530                        | UGT78D1            | -1.25              |
| AT5G17050                        | UGT78D2            | -1.24              |

Down-regulated genes with at least a 1.2 fold change in expression levels are shown. Total RNA (250 ng) from 3-week-old rosette leaves of Col-0 and miR858OX plants was used for hybridization. Raw data from CEL files were initially analyzed by Affymetrix Expression

---

Console. The  $\log_2$  transformed data were analysed using Affymetrix Transcriptome Analysis Console (TAC) 2.0 software.

---

**Supplementary Table S5.** Comparisons of seedling root length, fresh weight and rosette diameter in wild-type and miR858a transgenic lines

| <b>Genotype</b> | <b>Root length (cm)</b> | <b>Seedling fresh weight (mg)</b> | <b>Rosette diameter (cm)</b> |
|-----------------|-------------------------|-----------------------------------|------------------------------|
| WT              | $3.41 \pm 0.054$        | $2.84 \pm 0.05$                   | $7.32 \pm 0.37$              |
| L1              | -                       | -                                 | $7.72 \pm 0.16$              |
| L2              | $4.09 \pm 0.08^*$       | $3.46 \pm 0.07^{**}$              | $7.56 \pm 0.23$              |
| L2              | $4.31 \pm 0.06^{**}$    | $3.45 \pm 0.08^{**}$              | $7.8 \pm 0.1$                |
| <i>MIM1</i>     | -                       | -                                 | $5.88 \pm 0.08^{**}$         |
| <i>MIM2</i>     | $2.42 \pm 0.08^{**}$    | $2.11 \pm 0.04^{**}$              | $5.84 \pm 0.18^{**}$         |
| <i>MIM3</i>     | $2.35 \pm 0.04^{**}$    | $2.18 \pm 0.06^{**}$              | $5.72 \pm 0.1^{**}$          |

---

10-days-old seedlings grown on ½MS media under SD growth conditions were analysed. Mean value and standard error of triplicate analyses are presented. One-way ANOVA followed by post hoc Newman–Keuls was used for multiple comparison test of significance. L1 and *MIM1* data were shown in the main text.

---

**Supplementary Table S6.** Comparisons of plant height, rosette fresh weight and rosette diameter in mature wild-type and miR858a transgenic lines

| <b>Genotype</b> | <b>Plant height (inches)</b> | <b>Rosette fresh weight (mg)</b> | <b>Rosette diameter (cm)</b> |
|-----------------|------------------------------|----------------------------------|------------------------------|
| WT              | 19.35 ± 0.35                 | 916.6 ± 47.4                     | 9.2 ± 0.1                    |
| L1              | 19.66 ± 0.23                 | 833.22 ± 100                     | 10.2 ± 0.37                  |
| L2              | 20.22 ± 0.36*                | 939.3 ± 49.3                     | 8.52 ± 1.76                  |
| L3              | 20 ± 0.33*                   | 683.92 ± 52.5                    | 10.56 ± 0.16                 |
| <i>MIM1</i>     | 15 ± 0.43***                 | 466.52 ± 8.8***                  | 8.5 ± 0.12                   |
| <i>MIM2</i>     | 14.85 ± 0.26***              | 533.35 ± 31.1***                 | 9.32 ± 0.07                  |
| <i>MIM3</i>     | 16 ± 0.37***                 | 676.02 ± 32.1***                 | 9.5 ± 0.12                   |

40-days-old plants were analysed. Mean value and standard error of triplicate analyses are presented. One-way ANOVA followed by post hoc Newman–Keuls was used for multiple comparison test of significance.



**Supplementary Table S7.** Comparisons of flower size in wild-type and miR858a transgenic lines

| <b>Genotype</b> | <b>Flower size</b> |                   |
|-----------------|--------------------|-------------------|
|                 | <b>Length (mm)</b> | <b>Width (mm)</b> |
| WT              | 4.72 ± 0.4         | 2.02 ± 0.2        |
| L2              | 4.6 ± 0.2          | 1.65 ± 0.2        |
| L3              | 4.75 ± 0.2         | 1.75 ± 0.2        |
| <i>MIM2</i>     | 2.57 ± 0.2***      | 1.12 ± 0.2***     |
| <i>MIM3</i>     | 2.9 ± 0.2***       | 1.22 ± 0.2***     |

40-days-old plants were analysed. Mean value and standard error of triplicate analyses are presented. One-way ANOVA was used for multiple comparison test of significance.

**Supplementary Table S8.** Comparisons of silique, seed number and morphology in wild-type and miR858a transgenic lines

| <b>Genotype</b> | <b>Siliques per plant</b> | <b>Silique length (cm)</b> | <b>Seeds per silique</b> | <b>Seeds per 5 mg</b> |
|-----------------|---------------------------|----------------------------|--------------------------|-----------------------|
| WT              | 192.2 ± 10.2              | 10.7 ± 0.18                | 35.2 ± 0.8               | 193.5 ± 5             |
| L2              | 235.2 ± 4.3**             | 13.6 ± 0.18**              | 26.7 ± 0.7**             | 156.25 ± 2.3**        |
| L3              | 229.2 ± 3.4**             | 13.8 ± 0.25**              | 34.5 ± 1.5**             | 165.75 ± 2.7**        |
| <i>MIM2</i>     | 168.4 ± 10.2**            | 13 ± 0.21**                | 61.5 ± 1.3**             | 369.25 ± 4.1***       |
| <i>MIM3</i>     | 143.8 ± 4.9**             | 14.4 ± 0.13**              | 67.5 ± 1.6**             | 370.25 ± 6.2***       |

40-days-old plants were analysed. Mean value and standard error of triplicate analyses are presented. One-way ANOVA was used for multiple comparison test of significance.

**Supplementary Table S9.** Metabolite content in stem tissues of wild-type, miR858OX and *MIM858* transgenic lines

| MOLECULE        | ESI            | Precursor Ion | Daughter Ion | WT             | miR858OX          | <i>MIM858</i>     |
|-----------------|----------------|---------------|--------------|----------------|-------------------|-------------------|
| Naringenin      | Positive (M+H) | 273           | 153          | 4.92 ± 0.06    | 9.53 ± 0.1*       | 8.72 ± 0.1*       |
| Naringin        | Positive (M+H) | 581           | 419, 273     | 23.53 ± 0.3    | 20.56 ± 0.2       | 21.39 ± 0.3       |
| Kaempferol      | Positive (M+H) | 287           | 153, 121     | 2453.23 ± 33.5 | 3830.88 ± 63.9**  | 3506.09 ± 47.9**  |
| Quercetin       | Positive (M+H) | 303           | 229, 153     | 553.81 ± 6.9   | 847.87 ± 11.5**   | 795.79 ± 13.2**   |
| Q-3-O-G         | Positive (M+H) | 465           | 303          | 19.21 ± 0.3    | 24.66 ± 0.4*      | 40.06 ± 0.6**     |
| Rutin hydrate   | Positive (M+H) | 611           | 303          | 3178.47 ± 53.0 | 5221.99 ± 71.3**  | 4544.61 ± 75.9*   |
| Gallocatechin   | Negative (M-H) | 305           | 125          | 35.65 ± 0.5    | 14.32 ± 0.2*      | 79.3 ± 1.6**      |
| p-Coumaric acid | Positive (M+H) | 165           | 119, 91      | 647.83 ± 8.8   | 3230.87 ± 44.1*** | 1229.26 ± 23.9*** |
| Caffeic acid    | Positive (M+H) | 181           | 145, 117     | 526.42 ± 7.1   | 725.76 ± 9.9**    | 688.89 ± 9.4**    |
| Ferulic acid    | Positive (M+H) | 195           | 145, 117     | 182.63 ± 2.4   | 334.96 ± 5.5**    | 99.98 ± 1.3**     |
| Sinapic Acid    | Positive (M+H) | 225           | 175          | 495.39 ± 8.2   | 715.72 ± 9.7**    | 525.22 ± 7.1*     |
| Syringic acid   | Negative (M-H) | 197           | 182          | 644.1 ± 10.7   | 1167.39 ± 20.5*** | 1564.99 ± 26.1*** |

Stem tissue samples from plants were taken and metabolite contents analyzed by LC/MS/MS. Values presented are means ±SE (n=6) (µg 100 g<sup>-1</sup> dry weight) of measurements from at least five biological replicates per genotype. Statistically significant values from the wild-type is based on One-way ANOVA (\*P < 0.01, \*\*P < 0.001 and \*\*\*P < 0.0001). The ESI, precursor and daughter ions for the single metabolites are listed.

**Supplementary Table S10.** Information of primers used

| <b>Primer name</b>                           | <b>Primer Sequence (5' to 3')</b>                                                            |
|----------------------------------------------|----------------------------------------------------------------------------------------------|
| <b>For cloning and construct preparation</b> |                                                                                              |
| miR858_F                                     | ACGGTGGACATCAGAAGATGGAGATG                                                                   |
| miR858_R                                     | TATATACGAACGTAAAGACTTAAGC                                                                    |
| mi858BamHI_F                                 | GATTGGATCCGATGCTAGGCTTG                                                                      |
| mi858SacI_R                                  | GACTTGAGCTCATATATACCTAC                                                                      |
| ProMIR858_F                                  | CTAAAAGCTTTTCAAATTCAGTGGTCTTAC                                                               |
| ProMIR858_R                                  | AACACATAGGATCCTCAGTTTGTCAAGCCTAG                                                             |
| MIM858_F                                     | ATCTACCAGGAAGAACAGACAACGAAATAAAAAACAGGAAGAACAGACAACGAAATA<br>AAAACAGGAAGAACACATGACAACGAAAATC |
| MIM858_R                                     | TTTTTATTTTCGTTGTCATGTGTTCTTCTGTTTTTATTTTCGTTGTCTGTTCTTCTGTTAG<br>ATTTTCGTTGTCATG             |
| MIM858V_F                                    | AGGGAAATCTAGAATGCAGGCCTCTGCAG                                                                |
| MIM858V_R                                    | GAATTCGAGCTCGGTACCTCGGAATGCACCTA                                                             |
| M13_F                                        | GTAAAACGACGGCCAGT                                                                            |
| M13_R                                        | CAGGAAACAGCTATGAC                                                                            |
| CaMV 35S                                     | GTAAGGGATGACGCACAATCC                                                                        |
| Nos T                                        | GGACTCTAATCATAAAAAACCC                                                                       |
| <b>For qRT-PCR</b>                           |                                                                                              |
| Aly-miR858                                   | UUUCGUUGUCUGUUCGACCUU                                                                        |
| SnoR41Y                                      | GTTTTATTGTCATCTGATTCTCATGATGAATATATACCTCCTACTCATTCTGAGTG                                     |
| TUB_RTF                                      | GAGCCTTACAACGCTACTCTGTCTGTC                                                                  |
| TUB_RTR                                      | ACACCAGACATAGTAGCAGAAATCAAG                                                                  |
| mi858_RTF                                    | CGATCTCTCCTCAAACCCTA                                                                         |
| mi858_RTR                                    | CGATCGTCTATCTACCCCAATC                                                                       |
| CAB_RTF                                      | ATTCTTCGTTCAAGCCATCG                                                                         |
| CAB_RTR                                      | CAAGCGTTGTTGTGGACTGG                                                                         |
| CHS_RTF                                      | GGAGAAGTTCAAGCGCATGTG                                                                        |
| CHS_RTR                                      | ATGTGACGTTTCCGAATTGTCG                                                                       |
| CHI_RTF                                      | CTCTCTTACGGTTGCGTTTTTCG                                                                      |
| CHI_RTR                                      | CACCGTTCTTCCCGATGATAGA                                                                       |
| F3'H_RTF                                     | TTCCTTACCTTCAGGCGGTTATC                                                                      |
| F3'H_RTR                                     | CGAGAGTGGTGTGGTGGATG                                                                         |
| FLS1_RTF                                     | CCACCGTCATGCGTCAATTACAG                                                                      |
| FLS1_RTR                                     | TCTCCGCCGAGACCTTCTTTCAA                                                                      |
| DFR_RTF                                      | AGCCGCCAAGGGACGTTATATTTG                                                                     |
| DFR_RTR                                      | CCGGGAGAAAACCCTTTTGACGA                                                                      |
| MYB4_RTF                                     | CGCTTATTGCCGGGAGATTAC                                                                        |
| MYB4_RTR                                     | TTTCTTCGTATATGCGTGTTCCA                                                                      |
| MYB6_RTF                                     | TCAAACCTCCATAGCTTACTCGGT                                                                     |
| MYB6_RTR                                     | GTTTGTGGATCAATACCGTGACT                                                                      |
| MYB11_RTF                                    | CCGGGAAGAACAGACAACGA                                                                         |
| MYB11_RTR                                    | TTCTCGACGGTATTGGCGAC                                                                         |
| MYB12_RTF                                    | ACCAGGGAGAACAGACAACG                                                                         |
| MYB12_RTR                                    | TCGTCATGATTACGGCGGAG                                                                         |
| MYB13_RTF                                    | CTGCAAAATTGCCTGGACGA                                                                         |
| MYB13_RTR                                    | GATCTTGACTGTGGTGGAGTCT                                                                       |
| MYB20_RTF                                    | TACCAGGAAGAACAGACAACGA                                                                       |
| MYB20_RTR                                    | AGGATCAATCCCCATTTTCCTC                                                                       |

|                     |                                     |
|---------------------|-------------------------------------|
| MYB40_RTF           | TTGCCTCGCATTTCTCTGGT                |
| MYB40_RTR           | CCGGATCCAACCCAAGATGT                |
| MYB63_RTF           | TCGCTTCTCAACTTCCAGGTA               |
| MYB63_RTR           | GAGCTCTGAGCCAGTCTTTTCT              |
| MYB65_RTF           | GGCTGAACATTTACCTGGTCTG              |
| MYB65_RTR           | TGCTCGTTGTCTCCTCTTGA                |
| MYB83_RTF           | TAGCTACTCGGCTTCCAGGT                |
| MYB83_RTR           | AAGCCGCTTCTTCAATGTCG                |
| MYB86_RTF           | ATGGTCTCAAATCGCAACGC                |
| MYB86_RTR           | TGTGTTGTTGGGTCAATGCCT               |
| MYB93_RTF           | CGCATTTGCAAGGTCGTACA                |
| MYB93_RTR           | GGCTGATGAGTCACAGGATCG               |
| MYB111_RTF          | AAAGAGGAAATATTACTTCCGACGAA          |
| MYB111_RTR          | TTGTCTGTTCTTCTGGTAGATGTG            |
| TT2_RTF             | GATGGTCGTTGATAGCTGGGA               |
| TT2_RTR             | TTTTGCGGAGGTTTGAGTTCC               |
| MYBL2_RTF           | GGGAAGATTGCCAGGACGAA                |
| MYBL2_RTR           | GGTGTGATGGTGGAGACGAT                |
| CESA4_F             | GATCCGCTCAAGGAACCTC                 |
| CESA4_R             | TCAACGGCTAAGATCGAAAGA               |
| HCT_F               | GCTCTTAAGGCGAAATCCAAG               |
| HCT_R               | CTTCCCCTGATCTCCACAC                 |
| CCOAOMT1_F          | CTCACAAGATCGACTTCAGGG               |
| CCOAOMT1_R          | ACGCTTGTGGTAGTTGATGTAG              |
| CCR1_F              | ACCAAGTGCAAGGACGAGAA                |
| CCR1_R              | GTCGTAGAGGCTTTGCTTGG                |
| SND1_F              | AAGCTTGAGCCTTGGGATATT               |
| SND1_R              | TCCCGGTTGGATACTTCTTG                |
| CAD6_F              | TTGGGACGAAAATCGATAGC                |
| CAD6_R              | TGCTTTTATGCCATGCTCTG                |
| MYB58_F             | CATCATCAAACCTTACCAGAGC              |
| MYB58_R             | GCCACACATTCTTGATCTCATT              |
| DDF1_F              | CGGAGATGAGGCCTAAGAAG                |
| DDF1_R              | TGCCTCTGTAAACTGGGTGA                |
| JAZ5_F              | TCTTTGCTAAACGGAAAGACAGA             |
| JAZ5_R              | TGTCCTGCCTCTAGTGGTTGA               |
| JAZ7_F              | TGTGTTTTTCTTTCAGATGTTACCC           |
| JAZ7_R              | TCTCTGCTTGGATCGATATT                |
| JAZ8_F              | GATGTTACCCATCTTTCAGGCAA             |
| JAZ8_R              | CGACCCGTTTGGAGGATGACT               |
| AtMYB15_F           | GCCTGATATTAACGTGGCAAT               |
| AtMYB15_R           | GCTGCAATCGCTGACCAT                  |
| WRKY40_F            | TTGAAGAAGATCCACCGACA                |
| WRKY40_R            | CGAGAGCTTCTTGTTCAGC                 |
| ATMYB9_F            | TTCTCCAAATGGGGATTGAT                |
| ATMYB9_R            | GCGGGAGAGCTGCTAAAAC                 |
| <b>For RLM-RACE</b> |                                     |
| RACE OUTER          | GCTGATGGCGATGAATGAACACTG            |
| RACE INNER          | CGCGGATCCGAACACTGCGTTTGCTGGCTTTGATG |
| AtMyb6_R            | TTACAACAGTGACAAACGCGCCT             |

|           |                          |
|-----------|--------------------------|
| AtMyb11_R | ACAAAGCTCCATCGTCGCCATT   |
| AtMyb12_R | TCGTCATGATTACGGCGGAG     |
| AtMyb13_R | CTTATCGTTTCTATCTAGTGAGCC |
| AtMyb20_R | AAGAATGCGAAGATGTGGACGTG  |
| AtMyb42_R | CTTCCTCGGCAGCAGTGTGTTC   |
| AtMyb48_R | CTGATCATTGCAAAGTAAGACG   |
| AtMyb83_R | CACCTTCTACTGATACTCTCTTGC |
| AtTT2_R   | CAAGTGAAGTCTCGGAGCCAATC  |
| AtMybL2_R | TCATCGGAATAGAAGAAGCGTTT  |

---
